1 **Title:** Disruption of endosperm development is a major cause of hybrid seed inviability between  
2 *Mimulus guttatus* and *M. nudatus*

3  
4 Elen Oneal<sup>1</sup>, John H. Willis<sup>1</sup>, Robert G. Franks<sup>2</sup>

5  
6 <sup>1</sup> *Department of Biology, Duke University, 3319 French Family Science Center, 125 Science*  
7 *Drive, Durham, NC, 27705, USA*

8 <sup>2</sup> *Department of Genetics, North Carolina State University, 2548 Thomas Hall, Raleigh, NC,*  
9 *27695, USA*

10 *Email: eo22@duke.edu (EO), jwillis@duke.edu (JHW), rgfranks@ncsu.edu (RGF)*

11 Corresponding author: Elen Oneal, email: eo22@duke.edu; phone (919) 684-3368

12  
13 **Summary**

- 14
- 15 • Divergence of developmental mechanisms within populations may lead to hybrid  
16 developmental failure, and may be a factor driving speciation in angiosperms.
  - 17 • We investigate patterns of endosperm and embryo development in *Mimulus guttatus* and the  
18 closely related, serpentine endemic *M. nudatus*, and compare them to those of reciprocal  
19 hybrid seed. We address whether disruption in hybrid seed development is the primary  
20 source of reproductive isolation between these sympatric taxa.
  - 21 • *M. guttatus* and *M. nudatus* differ in the pattern and timing of endosperm and embryo  
22 development. Some hybrid seed exhibit early disruption of endosperm development and are  
23 completely inviable, while others develop relatively normally at first, but later exhibit  
24 impaired endosperm proliferation and low germination success. These developmental  
25 patterns are reflected in mature hybrid seed, which are either small and flat (indicating little  
26 to no endosperm), or shriveled (indicating reduced endosperm volume). Hybrid seed  
27 inviability forms a potent reproductive barrier between *M. guttatus* and *M. nudatus*.
  - 28 • We shed light on the extent of developmental variation between closely related species  
29 within the *M. guttatus* species complex, an important ecological model system, and provide a  
30 partial mechanism for the hybrid barrier between *M. guttatus* and *M. nudatus*.
- 31

32 **Keywords:** seed development, hybrid inviability, endosperm, postzygotic isolation, pollen-pistil  
33 interactions, *Mimulus guttatus* (monkeyflower)

34  
35 **Word Count**

36 Main body: 6425

37 Introduction: 1374

38 Materials and Methods: 1567

39 Results: 1863

40 Discussion: 1495

41 Acknowledgments: 126

42

## 42 Introduction

43 The process of gradual evolution imposes a fundamental constraint on organismal  
44 development – each successful evolutionary shift, large or small, must allow for viable offspring  
45 (Smith *et al.*, 1985; Bonner, 1988; Beldade *et al.* 2002). This constraint is perhaps best visualized  
46 by the disruption of development frequently observed when two divergent populations hybridize,  
47 when both lineages themselves continue to produce viable offspring. In nature, these  
48 incompatibilities can keep species distinct by preventing gene flow. In the laboratory, we can  
49 make use of incompatibilities witnessed in hybrid offspring to investigate how development has  
50 evolved in isolation and how evolutionary constraint may shape developmental trajectories. Here  
51 we describe differences in seed development between a recently diverged species pair – *Mimulus*  
52 *guttatus* and *M. nudatus*. We further show that postzygotic failures of development are largely  
53 responsible for incompatibility in experimental crosses between this sympatric species pair. We  
54 propose that the *M. guttatus* sp. complex may serve as a new model to understand the evolution  
55 of development and developmental abnormalities in hybrid plants.

56  
57 Development in multicellular organisms requires coordination across numerous cell lineages or  
58 types. The process of double fertilization in angiosperms is an extreme example as growth must  
59 be coordinated across two developing entities: the diploid embryo and the triploid, sexually-  
60 derived nutritive tissue called endosperm. Together these distinct entities comprise the  
61 angiosperm seed, a highly successful mode of reproduction employed by most vascular plants  
62 (Linkies *et al.*, 2010). While the developmental origins of embryo and endosperm have been  
63 known for over a century (Nawaschin, 1898; Guignard, 1899, Friedman, 2001), advances in  
64 genomic sequencing and gene expression analysis have only lately revealed the basic genetic  
65 details of embryogenesis and the development of endosperm (Girke *et al.*, 2000, Casson *et al.*  
66 2005; Hsieh *et al.*, 2011). The developing endosperm and its interactions with the embryo is  
67 often responsible for hybrid seed failure (Brink & Cooper, 1947; Haig & Westoby 1991)  
68 emphasizing the critical and sensitive role it plays in promoting successful reproduction.

69  
70 Despite the essential importance of endosperm, research on endosperm development has been  
71 largely restricted to the model system, *A. thaliana* and its close relatives (Scott *et al.*, 1998;  
72 Josefsson *et al.* 2006; Burkart-Waco *et al.*, 2013), even though several developmental and  
73 evolutionary peculiarities of the biology of *A. thaliana* may limit the applicability of research  
74 findings across the broader diversity of plants. For example, *A. thaliana* undergoes nuclear  
75 endosperm development, in which initial rounds of karyokinesis are not accompanied by  
76 cytokinesis. While this mode of development is shared by many groups of flowering plants, two  
77 other major modes of endosperm development, helobial and cellular, are also distributed widely  
78 among angiosperms (Bharathan, 2000). Indeed, *ab initio* cellular development, wherein  
79 karyokinesis is always followed by cytokinesis, is thought to be the ancestral state of endosperm  
80 development (Floyd & Friedman, 2000) and is characteristic of a few other model plant systems  
81 including *Solanum* (Lester & Kang, 1998) and *Mimulus* (Guilford & Fisk, 1951; Arekal, 1965).  
82 More broadly, the extent to which basic features of embryo and endosperm development may  
83 vary among closely related taxa remains an open question and one which can only be addressed  
84 by examining and comparing development between closely related species in other taxa.

85

86 Another factor limiting the applicability of research on endosperm in *A. thaliana* is that it is  
87 predominantly self-fertilizing. Self-fertilization limits a major evolutionary pressure on seed  
88 development by relaxing conflicts between maternal and paternal genomes over resource  
89 provisioning to developing seeds. Relying on *A. thaliana* as a model of endosperm development  
90 and failure potentially limits our ability to fully understand the evolutionary mechanisms shaping  
91 plant development. It also limits our ability to investigate the role mating system may play in the  
92 evolution of endosperm, a research topic that continues to garner increasing interest (Brandvain  
93 & Haig, 2005; Friedman *et al.*, 2008; Köhler *et al.*, 2012; Haig, 2013). Moreover, while seed  
94 inviability may be a potent hybrid barrier and potential driver of plant speciation (Tiffin *et al.*,  
95 2001), nearly all research on hybrid seed lethality in *A. thaliana* is focused on lethality resulting  
96 from interploidy crosses (Scott *et al.*, 1998; Köhler *et al.*, 2003), potentially limiting its  
97 application to divergence among diploid taxa.

98  
99 To extend our understanding of seed development and seed failure beyond *A. thaliana* we turn to  
100 the *Mimulus guttatus* species complex. The genus *Mimulus* (Phrymaeaceae) has emerged as a  
101 model system in which to investigate the genetic basis of ecological adaptation and the role of  
102 mating system evolution in promoting species divergence (Lowry & Willis, 2010; Martin &  
103 Willis, 2010; Wright *et al.*, 2013). Knowledge of the pattern of seed development in this  
104 increasingly important genus is limited to two papers published over 50 years ago on the species  
105 *Mimulus ringens* (Arekal, 1965) and the cultivar *M. tigrinus* (Guilford & Fisk, 1951), likely a  
106 hybrid between *M. luteus* and the Chilean species *M. cupreus* (Cooley & Willis, 2009). Seed  
107 inviability is a common outcome of crosses between members of the *M. guttatus* species  
108 complex, a highly diverse group of populations, ecotypes and species distributed across western  
109 North America (Vickery 1966, 1978). *M. guttatus* is the most geographically widespread and  
110 genetically diverse member of the complex (Wu *et al.*, 2007; Oneal *et al.* 2014), and exhibits  
111 varying interfertility with other members of the complex (Vickery, 1978; Wu *et al.*, 2007),  
112 however, hybridization between the closely related members of this complex is frequently  
113 accompanied by varying levels of hybrid seed failure (Vickery, 1978).

114  
115 While the edaphic endemic, *M. nudatus* is likely recently derived from a *M. guttatus*-like  
116 ancestor (Oneal *et al.*, 2014), this species pair exhibits the highest level of sequence divergence  
117 of any within the *M. guttatus* sp. complex (~3% genomic sequence divergence; L. Flagel,  
118 personal communication). Populations of serpentine-adapted *M. guttatus* overlap with those of *M.*  
119 *nudatus* at multiple serpentine soil sites in the California Coastal Ranges. Despite their close  
120 physical proximity and recent divergence, *M. guttatus* and *M. nudatus* rarely form hybrids. The  
121 absence of naturally occurring hybrids is all the more striking given that *M. guttatus* and *M.*  
122 *nudatus* also overlap substantially in flowering time and share multiple pollinators (Gardner &  
123 Macnair, 2000; J. Selby, unpublished data). Gardner and Macnair (2000) found that controlled  
124 field and greenhouse crosses recovered very few normal seed but instead produced seed that  
125 were shriveled and comparatively flattened, and that failed to germinate (Gardner, 2000).  
126 Together, these findings raise the possibility that the recent divergence between *M. guttatus* and  
127 *M. nudatus* has been accompanied by a shift in the pattern of embryo and endosperm  
128 development, that in turn contributes to their reproductive isolation.

129

130 Here we investigate early embryo and endosperm development within *M. guttatus*, a species  
131 which has emerged as an important model system in ecological and evolutionary genetics, and  
132 contrast it with development of *M. nudatus*, a serpentine soil endemic. Furthermore, we  
133 investigate whether seed inviability is the primary reproductive barrier between *M. guttatus* and  
134 *M. nudatus* (Gardner & Macnair, 2000). We first address whether interspecific pollen can  
135 successfully germinate and penetrate the ovary when either species serves as pollen donor. We  
136 then compare the development of hybrid seed with that of the normal pattern of development in  
137 both species, and attempt to determine at what point in development hybrid seed failure arises.  
138 Finally, we connect the development of hybrid seed to the phenotypes of mature seed collected  
139 from hybrid fruits and confirm that hybrid seed are largely inviable.

140  
141 We find that *M. guttatus* and *M. nudatus* exhibit divergent trajectories of early embryo and  
142 endosperm development, and suggest that early disruption of endosperm development and a later  
143 failure of endosperm proliferation are the major causes of hybrid seed failure and comprise major  
144 isolating mechanism between these species. Our work is the first to examine the pattern of seed  
145 development in *M. guttatus* and the first to examine the extent to which early seed development  
146 varies between *M. guttatus* and a closely related species, *M. nudatus*. Finally, since seed lethality  
147 is a common outcome of hybridization between multiple members of the *M. guttatus* sp. complex  
148 (Vickery, 1978), our results suggest that *M. guttatus*, which is already emerging as a model  
149 system in ecological genetics, could also provide valuable insight into the genetic basis of  
150 fundamental developmental processes and their importance for speciation in this group.

151

152

## 153 **Materials and Methods**

154 *Growth and pollination of Mimulus spp.*

155 *M. guttatus* is the most widespread member of the *M. guttatus* sp. complex and is adapted to a  
156 variety of soil conditions (Lowry *et al.* 2009, Wright *et al.* 2014), including serpentine soil.  
157 Serpentine-adapted *M. guttatus* and *M. nudatus* individuals were collected in 2008 from  
158 sympatric populations located at two serpentine soil sites in the Donald and Sylvia McLaughlin  
159 Natural Reserve in Lake County, California, and brought back to the Duke Research  
160 Greenhouses where they were self-fertilized for at least 2 generations to produce inbred lines.  
161 We use one inbred line per population in this study (see Table 1 for a list of accessions), and two  
162 populations each of serpentine-adapted *M. guttatus* and *M. nudatus*. The lines CSS4 (*M.*  
163 *guttatus*), CSH10 (*M. nudatus*) and DHRo22 (*M. nudatus*) were inbred for 2 generations. Most  
164 data generated using the *M. guttatus* accession DHR14 was acquired from a line that was inbred  
165 for 3 generations; however, we were unable to complete the study with these individuals, as they  
166 died prematurely in the greenhouse; we completed the study with a 6-generation inbred line of  
167 DHR14. All plants used in this study were grown from seeds that were first cold-stratified for 10  
168 days at 4°C, then placed in a greenhouse with 30% relative humidity and a light/temperature  
169 regime of 18-hour days at 21 °C and 6-h nights at 16 °C. Following germination, individuals  
170 were placed in 2.5-inch square pots where they were maintained for the duration of the study.

171

172 *M. guttatus* and *M. nudatus* are both self-compatible and self-fertilize regularly in the field,  
173 although *M. nudatus* is primarily outcrossing (Ritland & Ritland, 1989). Both species

174 produce hermaphroditic, chasmogamous flowers with four anthers, and invest similarly in male  
175 (e.g., stamens) vs. female (e.g., pistil) structures, however, *M. nudatus* flowers are smaller than  
176 those of *M. guttatus* and produce proportionately fewer ovules and pollen grains (~20% as many  
177 ovules and pollen grains) (Ritland & Ritland, 1989). To account for this imbalance in pollen  
178 production, we used 4 new flowers (i.e., 16 anthers) whenever *M. nudatus* served as pollen donor  
179 to *M. guttatus*. All crosses and self-pollinations were performed in the morning and using the  
180 same protocol. Pollen recipients were emasculated 1-3 days prior. The day of pollination, mature  
181 pollen was obtained by tapping the stamens of a fresh flower onto a glass slide, and then  
182 collected with a pair of sterile forceps and placed directly on the open, receptive stigma of the  
183 pollen recipient.

184

#### 185 *Pollen tube growth assay*

186 Pollinated styles and ovaries were fixed in Farmer's solution (3:1 95% EtOH:acetic acid) for at  
187 least 12 hours, then softened in 8N NaOH for 24 hours before being left to stain overnight in a  
188 decolorized aniline blue solution (0.1% in 0.1 M K<sub>3</sub>PO<sub>4</sub>) (Kearns & Inouye, 1993) that  
189 differentially stains pollen tubes callose plugs. Stained styles and ovaries were mounted on a  
190 slide and examined with a Zeiss Axio Observer equipped with a fluorescent lamp. We performed  
191 10 reciprocal crosses for each sympatric population pair (CSS4 x CSH10; CSH10 x CSS4;  
192 DHR14 x DHRo22; DHRo22 x DHR14) and then collected the styles and ovaries after 24 hours,  
193 a period sufficient to allow pollen from self-pollinations to penetrate the ovary in each  
194 population (Oneal, personal observation). For each pollination event we noted whether the pollen  
195 had successfully germinated and whether pollen tubes were observed within the ovary.

196

#### 197 *Seed set and viability*

198 We performed 8 reciprocal crosses for each sympatric population pair of *M. guttatus*/*M. nudatus*  
199 and 8 self-pollinations of each accession, collected the mature fruits and counted the resulting  
200 seeds under a dissection scope. Throughout, we use the term "self-fertilization" to describe  
201 fertilizations performed with pollen from the same accession (i.e., inbred line), but not  
202 necessarily the same individual plant. Normal *M. guttatus* and *M. nudatus* seeds are round, fully  
203 filled and unbroken with a light brown, reticulate coat (Searcy & Macnair, 1990). We counted  
204 the number of seed found in self-fertilized and hybrid fruits and categorized them by outward  
205 morphology. We also took pictures of mature seed using a Zeiss Lumar.V12 stereoscope  
206 outfitted with a AxioCam MRM firewire monochrome camera and measured the length of up to  
207 25 seed morphs for each self-fertilized accession and reciprocal cross. We sowed round,  
208 shriveled, and flat self-fertilized and hybrid seeds (see below) to compare germination rates. All  
209 seeds were cold-stratified, placed in the Duke Greenhouses as above, and examined over the  
210 course of 14-days for signs of germination.

211

#### 212 *Seed development*

213 Fruits resulting from interspecific crosses consistently contained seeds that fell into one of three  
214 different morphological categories (see below). We used microscopy to connect early embryo  
215 and endosperm development with the seed morphologies found in mature fruits and to compare  
216 the growth, and embryo and endosperm development, of self-fertilized seeds to those of  
217 reciprocal, sympatric hybrid seed. Self-fertilized and hybrid fruits were collected from 1-5 days

218 after pollination (DAP), and then at 9 DAP. Emasculated, but unpollinated ovaries were  
219 collected at 1-2 DAP.

220

221 We first examined whole-mounted fruits to get an initial sense of the pattern of embryo and  
222 endosperm development in self-fertilized and hybrid seeds from 1 to 5 DAP. Plant material was  
223 fixed in a solution of 9:1 EtOH:acetic acid for at least 2 hours and up to 48 hours, then washed  
224 twice in 90% EtOH for a minimum of 30 minutes per wash. Tissue was subsequently cleared in  
225 Hoyer's solution (70% chloral hydrate, 4% glycerol and 5% gum arabic) for at least 12 hours. A  
226 final dissection of the fruit in Hoyer's solution allowed unfertilized ovules and immature seed to  
227 be separated from the ovary or fruit and then mounted on a glass slide. We collected 3 replicate  
228 fruits per DAP for each hybrid cross or self-fertilization, as well as 3 unpollinated ovaries from  
229 each accession. Mounted specimens were observed with a Zeiss Axioskop2 or Zeiss Axio Imager  
230 using differential interference contrast (DIC) microscopy. We took pictures of up to 10 ovules  
231 per unfertilized ovary, 10 immature seed per self-fertilized fruit, and up to 10 of each seed morph  
232 (see below) per hybrid fruit, and used these images to measure the size of seed morphs.

233

234 We used laser confocal microscopy (LCM) to better visualize the pattern of early seed failure  
235 observed in whole mounted fruits (see below). Tissue was stained with propidium iodide  
236 according to Running (2007). Plant material was fixed under a vacuum with a solution  
237 containing 3.7% [v/v] formaldehyde, 5% [v/v] propionic acid, 70% [v/v] ethanol, and then  
238 subjected to a graded ethanol series to remove residual chlorophyll. Tissue was then subjected to  
239 a decreasing ethanol series, stained with propidium iodide dissolved in 0.1M L-arginine (pH  
240 12.4) for 2-4 days (stain time depended upon the size of the plant material), rinsed for 2-4 days in  
241 a 0.1M L-arginine buffer (pH 8.0), subjected to another graded ethanol series and then a final  
242 graded xylene series. Unfertilized ovules and immature seeds were dissected out and mounted in  
243 Cytoseal XYL. Images were acquired with a Zeiss 710 inverted scanning confocal microscope  
244 equipped with an argon laser. Some images (e.g., seed at 4-5 DAP) required the collection of  
245 extended z-stacks, which were assembled into composite 3-D images using the Zeiss Zen  
246 software.

247

248 We examined cross sections of self-fertilized and hybrid seeds collected at 9 DAP. Fruits were  
249 fixed under a vacuum with a solution containing 3.7% [v/v] formaldehyde, 50% [v/v] EtOH, and  
250 5% [v/v] glacial acetic acid, subjected to a graded ethanol series, then stained overnight in a  
251 0.1% Eosin solution. Stained tissue was subjected to a graded xylene series and then infused with  
252 and mounted in paraplast parafin. Fruits were sliced with a microtome into 0.8 micron sections,  
253 stained with toluidine blue, and sealed with Cytoseal XYL for imaging. Slides were examined  
254 and photographed with a Zeiss Axio Imager outfitted with a QImaging MicroPublisher 5.0 MP  
255 color camera.

256

257 To determine whether hybrid seeds that appeared to fail early in the course of development (see  
258 below) represented fertilized seeds (as opposed to unfertilized, aborted ovules), we used three  
259 lines of evidence. First, we used a vanillin stain to test for seed coat development in immature  
260 hybrid seed. In *A. thaliana*, vanillin in acidic solution (i.e., a 1% [w/v] vanillin solution in 6 N  
261 HCL) turns red or brown upon binding to proanthocyanidins in the seed coat; a positive stain is

262 indicative of seed coat development and suggests that fertilization has occurred (Deshpande *et al.*,  
263 1986; Roszak & Köhler, 2011). We tested for seed coat development in 5 DAP reciprocal hybrid  
264 seed, and unpollinated ovaries (negative control) collected 5 days after emasculation. Second,  
265 we measured the length, from micropylar to chalazal end, of hybrid seed and compared their  
266 growth trajectory to that of self-fertilized seed. Third, using our LCM images, we compared the  
267 width of the central cell of unfertilized ovules from a subset of our accessions (DHR14 and  
268 DHRo22) to the width of the putative primary endosperm cell of DHR14 x DHRo22 reciprocal  
269 hybrid seed that exhibited signs of arrest at 2 DAP. An increase in size of the putative primary  
270 endosperm cell over the central cell is suggestive of successful fertilization (Williams, 2009).  
271 Throughout, measurements of size were taken using ImageJ software (Rasband, 1997). All  
272 crosses are given with the female parent listed first (i.e., female x male). Unless accessions  
273 differed significantly (noted in the text), data are pooled across accessions for both *M. guttatus*  
274 and *M. nudatus*.

275

## 276 **Results**

### 277 *Pollen germination and tube growth*

278 The inability of pollen from one species to successfully germinate, tunnel down the style, and  
279 penetrate the ovary of another species is a common prezygotic barrier to hybridization in  
280 flowering plants (Galen & Newport, 1988; Boavida *et al.*, 2001; Campbell *et al.*, 2003; Ramsey  
281 *et al.*, 2003). In the *M. guttatus* sp. complex, pollen failure contributes to transmission distortion  
282 in crosses between *M. guttatus* and the closely related *M. nasutus* (Fishman *et al.*, 2008).  
283 Gardner and Macnair (2000) reported that mature hybrid fruits contained few viable seeds but  
284 were filled with “dust”; however, they did not specify whether these particles were aborted seeds  
285 or unfertilized ovules. To clarify this, we investigated whether *M. guttatus* pollen could  
286 germinate and successfully penetrate the ovary of *M. nudatus* and vice versa, a precondition for  
287 fertilization. We found that interspecific pollen successfully germinated in all crosses and that  
288 some pollen grains were nearly always successful in tunneling down to the ovary within 24-  
289 hours (Table 2; Fig. 1). Identity of the female parent did not affect ability of interspecific pollen  
290 to penetrate the ovary (Wilcox rank-sum test,  $p > 0.1$ , data pooled across accessions).  
291 Furthermore, fruits resulting from *M. guttatus* x *M. nudatus* crosses typically swell and increase  
292 in size in a manner similar to fruits resulting from self-fertilization in either species (Fig. 2).

293

### 294 *Seed set and germination success*

295 The majority of seeds from mature self-fertilized fruits of *M. guttatus* and *M. nudatus* are round  
296 and unbroken with a light brown, reticulate coat (Searcy & Macnair, 1990) (Fig. 2, Fig. 3;  
297 termed “round” in this work). Most self-fertilized fruits (30 of 32) also contained a minority of  
298 seeds which were shriveled and irregularly shaped (Fig 3. termed “shriveled”), and were  
299 significantly smaller than the usual, round seed for both species (seed length: *M. guttatus*  $F_{1,98} =$   
300  $58.647$ ,  $p < 0.001$ ; *M. nudatus*  $F_{1,95} = 108.14$ ,  $p < 0.001$ ). For both species, the size difference  
301 between round and shriveled seeds varied with accession (two-way ANOVA: *M. guttatus*  $F_{1,98} =$   
302  $4.24$ ,  $p = 0.002$ ; *M. nudatus*  $F_{1,95} = 10.0$ ,  $p = 0.042$ ). In addition, several self-fertilized fruits (1 *M.*  
303 *nudatus* and 5 *M. guttatus*) contained a few seeds (16 total) that were considerably smaller than  
304 round, wild type seed and of a brown, flat appearance (Fig 3. termed “flat”). The proportion of  
305 round seed was lower in *M. guttatus* than *M. nudatus* (*M. guttatus*: round mean =  $69.3\% \pm 19.2$

306 SD; *M. nudatus*: round mean = 80.7% ± 21.8 SD) (Fig. 3). Total seed set per fruit of self-  
307 fertilized accessions was 77.3 (± 40.9 SD) for *M. guttatus* and 84.0 (± 19.7 SD) for *M. nudatus*.  
308 (Fig. 4).

309  
310 Total seed set did not differ between self-fertilized fruits and fruits resulting from interspecific  
311 crosses (two-way ANOVA,  $p > 0.1$  for *M. guttatus* or *M. nudatus* female) (Fig 4; Supplementary  
312 Fig. 1). Of 16 interspecific *M. guttatus* x *M. nudatus* crosses, only one produced one round seed.  
313 Instead, most hybrid seeds (mean = 76.8% ± 24.8 SD) were dark brown and shriveled (termed  
314 “shriveled”), resembling the shriveled seed present at lower frequency in self-fertilized fruits  
315 (Fig. 2e, Fig. 3, Supplementary Fig. 2). The remaining hybrid seeds (mean = 23.2% ± 24.8 SD)  
316 were very small, dark brown and flattened in appearance (Fig. 2e, Fig. 3, Supplementary Fig. 2)  
317 (termed “flat”). These latter seeds were clearly distinguishable from unfertilized ovules, which  
318 are smaller and light pink in color (due to a lack of seed coat) (Searcy & Macnair, 1990). We  
319 found one round seed with endosperm that had exploded through the seed coat in one of 16  
320 mature fruits where *M. nudatus* was the female (CSH10 x CSS4). Otherwise, *M. nudatus* x *M.*  
321 *guttatus* crosses produced hybrid seed that were either shriveled or small and flat (mean  
322 shriveled = 40.0% ± 19.2 SD; mean flat = 59.6% ± 19.1 SD) (Fig. 3).

#### 323 324 *Germination Success*

325 Averaging across accessions, 92% (± 5.6 SD;  $N=50$ ) of seed from self-fertilized *M. guttatus*  
326 accessions germinated, while 62.5% (± 26.5 SD;  $N=32$ ) of self-fertilized *M. nudatus* seed  
327 germinated (see Table 3 for germination success by accession and cross); the difference between  
328 the species was not significant (Fisher exact test,  $p = 0.484$ ). Shriveled seeds from self-fertilized  
329 fruits germinated at a lower rate for both species (*M. guttatus* = 13.6%; *M. nudatus* = 3.5%,  $p <$   
330 0.001 for both comparisons, Fisher’s exact test). Hybrid seed germinated only when *M. guttatus*  
331 was the female, and then at significantly lower rates (6.01% overall; Fisher’s exact test,  $p <$   
332 0.0001). None of the flat seeds germinated, including flat seeds from self-fertilized fruits.

#### 333 334 *M. guttatus* seed development

335 The *Mimulus* mature female gametophyte is the Polygonum type, which possesses two haploid  
336 synergid cells, a haploid egg cell and two antipodal cells, one of which is binucleate (as  
337 described for *M. ringens* (Arekal, 1965)) (Fig. 5a. Within 24-hours after pollination, many *M.*  
338 *guttatus* seeds can be seen undergoing the first transverse division of the primary endosperm cell.  
339 At 2 DAP, endosperm development consists of 2 to 8 evenly spaced endosperm nuclei (Fig. 5b),  
340 and the establishment of the chalazal and micropylar domains. The micropylar domain is  
341 anchored by two cells whose nuclei accumulate multiple nucleoli—signs of endoreduplication, a  
342 phenomenon commonly observed in plant tissue (Galbraith et al., 1991). The chalazal  
343 haustorium, also containing two very large nuclei, differentiates from the central endosperm,  
344 occupying the chalazal domain. At times, the cells micropylar haustorium can be seen to  
345 penetrate beyond the base of the micropylar domain towards the chalazal domain. By 3 DAP,  
346 cellularized endosperm continues to proliferate, the embryo is at the 2/4-cell stage, and the  
347 chalazal haustorium has already begun to degrade (Fig. 5c). Between 4-5 DAP, the embryo  
348 progresses rapidly from the 8-celled stage with suspensor to the late globular stage (Fig. 5d,e).  
349 The seed contains regularly dispersed endosperm (Fig. 5e), which becomes densely packed by 9



350 DAP (Fig. 6e); at this point the micropylar haustorium has largely degenerated, but remains  
351 visible as a darkly stained element in the micropylar domain (Fig 6e).

352

### 353 *M. nudatus* seed development

354 The female gametophyte of *M. nudatus* is significantly smaller than that of *M. guttatus* (one-  
355 tailed t-test,  $p < 0.001$ ). Development of *M. nudatus* seeds parallels that of *M. guttatus* but with  
356 some important differences. Most notably, endosperm and embryo development proceed more  
357 slowly in *M. nudatus* than in *M. guttatus* (Fig. 5f-i). In addition, *M. nudatus* endosperm is less  
358 compact and regularly spaced. Division of the primary endosperm nucleus is initiated by 2 DAP  
359 and completed by 3DAP (Fig. 5f,g). The chalazal and micropylar haustoria emerge by 3 DAP;  
360 both are more prominent and persist longer in *M. nudatus* than *M. guttatus* (Fig. 5g,h). At 5 DAP,  
361 the *M. nudatus* embryo is a 16-cell embryo (Fig. 5i). At 9 DAP, embryo development ranges  
362 from heart stage to torpedo stage (Fig. 6h).

363

### 364 *Early hybrid seed development*

365 Earlier work suggested that the primary barrier to hybridization between *M. guttatus* and *M.*  
366 *nudatus* was the formation of nonviable hybrid seed (Gardner & Macnair, 2000). To test this, we  
367 compared the development of seeds from reciprocal, interspecific crosses to that of seeds  
368 resulting from self-fertilizations for each accession of *M. guttatus* and *M. nudatus*, respectively.  
369 We found that reciprocal *M. guttatus* x *M. nudatus* crosses produced broadly similar  
370 developmental trajectories for hybrid seed: an early stage of arrested development (Fig. 7), a  
371 pattern of delayed embryo development visible by 5 DAP (Fig. 6a-d), and retarded endosperm  
372 proliferation evident at 9 DAP (Fig. 6e-i).

373

374 Seeds that fail early are distinguishable as early as 2 DAP. At this stage, *M. guttatus* and *M.*  
375 *nudatus* self-fertilized seed have undergone at least one and often a few divisions of the primary  
376 endosperm cell. In hybrid seed at 2 DAP, regardless of which species serves as maternal parent,  
377 the putative primary endosperm cell widens and becomes significantly larger than the central cell  
378 of the female gametophyte of the maternal parent (t-test,  $p < 0.001$  for both crossing directions).  
379 These seeds are also significantly longer than unfertilized ovules (t-test,  $p < 0.0001$  for both  
380 crossing directions) but do not increase substantially in size over time (Fig. 8a,b).

381

382 Confocal microscopy of these hybrid seed indicates that at 2 DAP, transverse division of the  
383 primary endosperm cell has failed to occur; cells walls are not evident, and the cell is filled with  
384 multiple vacuoles (Fig. 7b,d). Fruits at 4-5 DAP may show some signs that the primary  
385 endosperm cell of these early arrested seed may have undergone one or a few divisions (Fig.  
386 7c,e), including the presence of a few cell walls (Fig. 7e). Also at this stage, one or a few  
387 endosperm nuclei appear to contain multiple nucleoli, potentially due to endoreduplication (Fig.  
388 7c,e). Intriguingly, for both cross directions the primary endosperm cell of 2 DAP hybrid seeds  
389 appears to be filled with nucleic acids (either DNA or RNA) bound to the propidium iodide stain.  
390 This fluorescence often, but not always, diminishes by 4-5 DAP (Fig 7c,e). As in self-fertilized  
391 seed, micropylar haustoria are evident by 2 DAP and at later stages exhibit multiple nucleoli. By  
392 5 DAP, a few arrested seeds may even show evidence of embryo growth (Fig 7c), albeit at a very  
393 early stage. Exposure to vanillin stain of hybrid fruit at 5 DAP reveals two distinct sizes of dark

394 seed. We suggest that the smaller seeds, which are darker than ovules from unpollinated ovaries  
395 (Fig. 9), represent the early arrested hybrid seeds (i.e., flat seeds), while the larger dark seeds  
396 represent hybrid seed that develop embryos and proliferating endosperm, but have a later,  
397 shriveled appearance.

398

#### 399 *Later hybrid seed development*

400 In contrast to these early arresting seeds, many hybrid seed undergo development that at the  
401 earliest stages (2-4 DAP) closely resembles that of the maternal parent (as described above),  
402 including in the initial pattern of endosperm division and cellularization and the timing of the  
403 emergence and eventual degeneration of chalazal and micropylar haustoria. Notably, these seeds  
404 are typically slightly smaller than seed from the self-fertilized maternal parent (Fig. 8a,b; see  
405 Supplementary Fig. 3 for growth by accession). For both crossing directions, however, by 5 DAP  
406 hybrid embryo development is slightly delayed: *M. guttatus* x *M. nudatus* embryos range from 8-  
407 to 16-cell embryos, as compared to *M. guttatus* embryos, which are at the globular stage (Fig.  
408 6a,b). Similarly, *M. nudatus* x *M. guttatus* hybrid embryos are at the 8-cell stage while the *M.*  
409 *nudatus* embryo is more typically at the 16-cell to early globular stage (Fig. 6c,d). This delay  
410 persists at later stages and moreover, is accompanied by defects in endosperm proliferation at 9  
411 DAP (Fig. 6e-i). Compared to *M. guttatus* and *M. nudatus* self-fertilized seed, at 9 DAP hybrid  
412 seed exhibit endosperm that is patchily distributed and less dense. Connecting these patterns of  
413 early and late endosperm development in hybrid seed with the phenotypes of hybrid seeds found  
414 in mature fruits leads us to conclude that the early arrested seed most likely become the small,  
415 flat seeds recovered in mature fruits, while the hybrid seed that continue to develop, but in a  
416 delayed fashion, likely mature to become the shriveled seed of mature fruits (Fig. 2e,f).

417

#### 418 **Discussion**

419 Comparing the pattern of embryo development of *M. guttatus* and *M. nudatus* with that of *M.*  
420 *ringens* (Arekal, 1965), and to a lesser extent, the cultivar *M. tigrinus* (Guilford & Fisk, 1951)  
421 enables us to shed light on the variation in seed development within the Phrymaeaceae. Like *M.*  
422 *ringens* and *M. tigrinus*, both *M. guttatus* and *M. nudatus* exhibit the Polygonum-type of female  
423 gametophyte and *ab initio* cellular endosperm. They also share the development of micropylar  
424 and chalazal haustoria, organs that appear to funnel nutrients from the maternal plant to the  
425 developing seed (Raghavan, 1997; Nguyen *et al.*, 2000, Płachno *et al.*, 2013) (Fig. 5). The  
426 chalazal haustorium appears to be more prominent and persist longer in *M. nudatus* than in *M.*  
427 *guttatus* or *M. ringens* (Arekal, 1965). Another notable developmental difference between *M.*  
428 *guttatus* and *M. nudatus* is the pattern of endosperm development: endosperm cellularization  
429 appears to produce cells that are more regularly dispersed in *M. guttatus* than in *M. nudatus* at 5  
430 DAP (Fig. 6a,c). Finally, the pace of embryo development also differs, with the *M. guttatus*  
431 embryo at the globular stage by 5 DAP, while that of *M. nudatus* is still at the 16-cell stage (Fig.  
432 6a,c).

433 Dysfunctional endosperm development is associated with reduced hybrid seed viability in many  
434 groups of flowering plants, including *Solanum* (Johnston and Hanneman, 1982; Lester & Kang,  
435 1998), *Amaranthus* (Pal *et al.*, 1972), *Lilium* (Dowrick & Brandham, 1970), *Oryza* (Fu *et al.*,  
436 2009), and *Arabidopsis* (Scott *et al.*, 1998), and now, *Mimulus*, where disrupted endosperm

437 development manifests itself as one of two phenotypes. In the first phenotype, division of the  
438 primary endosperm cell almost never occurs. The arrested seed enlarges slightly and seed coat  
439 development occurs, indicating that fertilization has occurred, but initial growth quickly plateaus  
440 and by 5 DAP, these arrested seeds are less than 1/3 the size of developing hybrid seeds. These  
441 early arrested seed likely eventually become the small flat seeds found in mature hybrid fruits,  
442 and never successfully germinate.

443 The second dysfunctional endosperm phenotype is represented by hybrid seed that appear to  
444 develop relatively normally from 1 to 5 DAP, but exhibit impaired endosperm proliferation by 9  
445 DAP, and are ultimately deficient in total endosperm volume as demonstrated by their shriveled,  
446 phenotype at maturity. Embryo development is also impaired, with a slight delay evident at 5  
447 DAP that continues to accumulate by 9 DAP (Fig. 6). The development of these seeds suggests  
448 that even when endosperm cellularization initially proceeds, transfer of resources from the  
449 maternal plant to this nutritive tissue may yet be limited. In addition to its primary role of  
450 providing nutrition to the embryo, endosperm tissue actively regulates and modulates embryo  
451 growth (Lester & Kang, 1998, Costa *et al.*, 2004, Hehenberger *et al.*, 2012). Disruption in  
452 endosperm development may be accompanied by arrested or reduced embryo development  
453 (Lester & Kang, 1998, Scott *et al.*, 1998). Future experiments, such as embryo rescue (e.g.,  
454 Rebernick *et al.* 2015), would be needed to tease apart the relative contributions of endosperm vs.  
455 embryo inviability due to the strong hybrid incompatibility *M. guttatus* and *M. nudatus*.  
456 Intriguingly, both small, flat seeds and shriveled seeds have been previously described in crosses  
457 involving copper-adapted *M. guttatus* (Searcy & Macnair, 1990), suggesting a common  
458 developmental mechanism underlying failed seed development in the *M. guttatus* species  
459 complex.

#### 460 461 *Speciation*

462 By visualizing the progress of pollen tubes and examining development of seeds in hybrid fruits,  
463 we conclude that interspecific pollen is functionally capable of fertilization regardless of which  
464 species serves as maternal parent, and also that under controlled conditions, fertilization  
465 produces large numbers of hybrid seed in both directions. Nevertheless, *M. guttatus* and *M.*  
466 *nudatus* are strongly reproductively isolated. Field experiments, as well as microsatellite and  
467 genomic sequencing data suggest that introgression between these species is rare (Gardner &  
468 Macnair, 2000; Oneal *et al.*, 2014; L. Flagel, unpublished data). Few if any seeds of round  
469 appearance are produced from crosses between *M. guttatus* and *M. nudatus*. Early dysfunctional  
470 endosperm development results in small, flat hybrid seed that never germinate, and the fraction  
471 of these apparently inviable seed can be substantial, ranging from 23% of hybrid seed when *M.*  
472 *guttatus* is female, to 60% when *M. nudatus* serves as female (Fig. 3). Germination success of  
473 shriveled hybrid seed is very low (6.0% averaged across *M. guttatus* accessions; 0% for *M.*  
474 *nudatus* accessions).

475  
476 We conclude, like Gardner and Macnair (2000), that postzygotic seed inviability forms the  
477 primary barrier between *M. guttatus* and *M. nudatus*, but differ with their conclusions in some  
478 respects. Most notably, we cannot rule out that subtle pollen-pistil interactions may yet serve as a  
479 partial prezygotic isolating mechanism, since we did not explicitly test whether interspecific

480 pollen suffers a competitive disadvantage in fertilization success. We note that hybrid crosses  
481 where *M. nudatus* served as female had substantially lower seed set than self-fertilized *M.*  
482 *nudatus*, which is suggestive of a relative deficiency of *M. guttatus* pollen when fertilizing *M.*  
483 *nudatus*. Second, speculating that bee pollinators would find landing on the *M. guttatus* stigma  
484 more difficult, Gardner and Macnair (2000) concluded that any gene flow was likely asymmetric  
485 and would flow more in the direction of *M. guttatus* to *M. nudatus* than the reverse. We found,  
486 however, that none of the hybrid seed in which *M. nudatus* was the female parent germinated.  
487 Gardner and Macnair (2000) also found that only rounded hybrid seed germinated, and at a very  
488 low rate (< 1%), while shriveled seeds did not germinate at all. We found instead that none of the  
489 few round, hybrid seed germinated, but up to 6.74% of shriveled hybrid seed germinated. We  
490 attribute this difference to the fact that we recovered very few round hybrid seed to assay for  
491 germination ( $N=3$ ) and to differences in our categorization of hybrid seed: we found that mature  
492 hybrid seed lie on a continuum of endosperm fullness, and that distinguishing between round and  
493 shriveled hybrid seed was somewhat subjective. Since the shriveled appearance of these hybrid is  
494 indicative of incomplete endosperm development (Lester & Kang, 1998), in the future, seed  
495 weight may be a better measure of the completeness of endosperm development in hybrid seed.

496  
497 Studies of aberrant seed development in interploidy crosses between *A. thaliana* accessions  
498 suggest that dosage imbalances in the expression of imprinted paternally and maternally  
499 expressed alleles and/or their regulatory targets causes dysfunctional embryo and endosperm  
500 development and ultimately, aborted seeds (Birchler, 1993, Köhler *et al.*, 2003, Reyes and  
501 Grossniklaus 2003, Josefsson *et al.* 2006, Erilova *et al.* 2009, Kradolfer *et al.* 2013). In theory,  
502 such dosage imbalances could underlie failed diploid crosses as well, for example via changes in  
503 imprinting status, sequence divergence or gene duplication of involved loci in one or both  
504 species, all of which might alter the critical balance of dosage-sensitive genes necessary for  
505 normal seed development (Johnston and Hanneman, 1982; Birchler & Veitia, 2010; Köhler *et al.*,  
506 2010, Köhler *et al.*, 2012, Birchler 2014). While the vast majority of reciprocal *M. guttatus* x *M.*  
507 *nudatus* seeds appear deficient in endosperm development, it is intriguing that one *M. nudatus* x  
508 *M. guttatus* cross produced two rounded seeds with exploded endosperm, a phenotype associated  
509 with excessive expression of paternally imprinted alleles in failed *A. thaliana* interploidy crosses  
510 (Scott *et al.*, 1998). This raises the possibility that imbalances in the dosages of genes involved in  
511 mediating maternal investment in endosperm of developing seeds may contribute to postzygotic  
512 isolation between *M. guttatus* and *M. nudatus*. Mapping the genes associated with interspecific  
513 endosperm failure will enable us to test this possibility.

514  
515 While hybrid seed lethality has long been recognized as a common postzygotic isolating  
516 mechanism among members of the ecologically and genetically diverse *M. guttatus* sp. complex  
517 (Vickery, 1978; Gardner and Macnair, 2000), our work is the first to provide a partial  
518 developmental mechanism—early arrested endosperm development and later failures of  
519 endosperm proliferation—for that outcome, and to provide insight into the early stages of  
520 endosperm and embryo development for members of the complex. We find that despite the fact  
521 that *M. nudatus* is likely recently derived from a *M. guttatus*-like ancestor (Oneal *et al.*, 2014),  
522 these species exhibit different patterns of embryo and endosperm development. The temporal  
523 coordination of development across cell types with different developmental roles is increasingly

524 recognized as a critical aspect of achieving normal development (Del Toro-De León *et al.*, 2014;  
525 Gillmor *et al.*, 2014). We suggest that divergence in the timing of development between *M.*  
526 *guttatus* and *M. nudatus* may partly underlie the near complete hybrid barrier between them. Our  
527 work provides a framework for further investigation of the role of this fundamental  
528 developmental feature in the divergence between these closely related species. The extensive  
529 genomic tools already developed for the *M. guttatus* sp. complex, including an annotated genome  
530 sequence for *M. guttatus*, extensive Illumina re-sequence data from *M. nudatus*, and the  
531 continued development of transgenic experimental methods (Yuan *et al.*, 2014) will only  
532 enhance future work on this important aspect of plant evolution and speciation.

533

### 534 **Acknowledgements**

535 The authors would like to thank Phillip Benfey for allowing us to use a Zeiss Axio Observer  
536 dissecting microscope to obtain pictures of pollen-tube fluorescence, and Louise Lieberman for  
537 her assistance in obtaining images of pollen tube growth. We thank Yasheng Gao of the Duke  
538 Microscopy Facility for assistance with DIC imaging, as well as Eva Johannes at NC State  
539 University and Benjamin Carlson at Duke with assistance with laser confocal microscopy.  
540 Jessica Selby initially collected the populations used in this study. We thank Yaniv Brandvain,  
541 Clément Lafon-Placette, and Claudia Köhler and three anonymous referees for their insightful  
542 comments on an earlier manuscript. Funding was provided by the National Science Foundation  
543 grants EF-0328636 and EF-0723814 to J.W., as well as an NIH NRSA fellowship  
544 (1F32GM097929-01) to E.O.

545

545 **References**

- 546
- 547 Arekal GD. 1965. Embryology of *Mimulus ringens*. *Botanical Gazette* **1965**: 58-66.
- 548
- 549 Beldade P, Koops K, Brakefield PM. 2002. Developmental constraints versus flexibility in  
550 morphological evolution. *Nature* **416**: 844-847.
- 551
- 552 Bharathan G. 1999. Endosperm development in angiosperms: a phylogenetic analysis.  
553 *Biodiversity, taxonomy, and ecology*, 167-180.
- 554
- 555 Birchler JA. 1993. Dosage analysis of maize endosperm development. *Annual Review of*  
556 *Genetics* **27**: 181-204.
- 557
- 558 Birchler JA. 2014. Interploidy hybridization barrier of endosperm as a dosage interaction.  
559 *Frontiers in Plant Science* **5**: 1-4.
- 560
- 561 Birchler JA & Veitia RA. 2010. The gene balance hypothesis: implications for gene regulation,  
562 quantitative traits and evolution. *New Phytologist* **186**: 54-62.
- 563
- 564 Boavida LC, Silva JP, Feijó JA. 2001. Sexual reproduction in the cork oak (*Quercus suber* L). II.  
565 Crossing intra-and interspecific barriers. *Sexual Plant Reproduction* **14**: 143-152.
- 566
- 567 Bomblies K, Lempe J, Epple P, Warthmann N, Lanz C, Dangl JL, Weigel D. 2007. Autoimmune  
568 response as a mechanism for a Dobzhansky-Muller-type incompatibility syndrome in plants.  
569 *PLoS biology* **5**: e236.
- 570
- 571 Bonner JT. 1988. *The evolution of complexity*. Princeton Univ. Press, Princeton, NJ.
- 572
- 573 Burkart-Waco D, Ngo K, Dilkes B, Josefsson C, Comai L. 2013. Early disruption of maternal-  
574 zygotic interaction and activation of defense-like responses in *Arabidopsis* interspecific crosses.  
575 *The Plant Cell Online*, 25(6), 2037-2055.
- 576
- 577 Brandvain Y, Haig D. 2005. Divergent mating systems and parental conflict as a barrier to  
578 hybridization in flowering plants. *The American Naturalist* **166**: 330-338.
- 579
- 580 Brink RA, & Cooper DC. 1947. The endosperm in seed development. *The Botanical Review* **13**:  
581 479-541.
- 582
- 583 Campbell DR, Alarcon R, Wu CA. 2003. Reproductive isolation and hybrid pollen disadvantage  
584 in *Ipomopsis*. *Journal of evolutionary biology* **16**: 536-540.
- 585
- 586 Casson S, Spencer M, Walker K, & Lindsey K. 2005. Laser capture microdissection for the  
587 analysis of gene expression during embryogenesis of *Arabidopsis*. *The Plant Journal* **42**: 111-  
588 123.

589  
590 Cooley AM, Willis JH. 2009. Genetic divergence causes parallel evolution of flower color in  
591 Chilean *Mimulus*. *New Phytologist* **183**: 729-739.  
592  
593 Costa CB, Costa JA, de Queiroz LP, Borba EL. (2013). Self-compatible sympatric *Chamaecrista*  
594 (Leguminosae-Caesalpinioideae) species present different interspecific isolation mechanisms  
595 depending on their phylogenetic proximity. *Plant Systematics and Evolution*, 299(4), 699-711.  
596  
597 Costa LM, Gutierrez-Marcos JF, Dickinson HG. 2004. More than a yolk: the short life and  
598 complex times of the plant endosperm. *Trends in plant science* **9**: 507-514.  
599  
600 Coyne JA, Orr HA. 2004. *Speciation*. Sunderland, MA: Sinauer Associates.  
601  
602 Del Toro-De León G, García-Aguilar M, Gillmor CS. 2014. Non-equivalent contributions of  
603 maternal and paternal genomes to early plant embryogenesis. *Nature* **514**, 624-627.  
604  
605 Deshpande SS, Cheryan M, Salunkhe DK, & Luh BS. 1986. Tannin analysis of food products.  
606 *Critical Reviews in Food Science & Nutrition* **24**: 401-449.  
607  
608 Dowrick GJ, Brandram SN. 1970. Abnormalities of endosperm development in *Lilium* hybrids.  
609 *Euphytica* **19**: 433-442.  
610  
611 Erilova A, Brownfield L, Exner V, Rosa M, Twell D, Scheid OM, Hennig L, Köhler C. 2009.  
612 Imprinting of the Polycomb Group gene *MEDEA* serves as a ploidy sensor in *Arabidopsis*. *PLoS*  
613 *Genetics* **5**: e1000663  
614  
615 Fishman L, Aagaard J, Tuthill JC. 2008. Toward the evolutionary genomics of gametophytic  
616 divergence: patterns of transmission ratio distortion in monkeyflower (*Mimulus*) hybrids reveal a  
617 complex genetic basis for conspecific pollen precedence. *Evolution* **62**: 2958-2970.  
618  
619 Floyd SK, Friedman WE. 2000. Evolution of endosperm developmental patterns among basal  
620 flowering plants. *International Journal of Plant Sciences* **161**: S57-S81.  
621  
622 Friedman WE. 2001. Comparative embryology of basal angiosperms. *Current Opinion in Plant*  
623 *Biology* **4**: 14-20  
624  
625 Friedman, WE, Madrid, EN, Williams, JH. 2008. Origin of the fittest and survival of the fittest:  
626 relating female gametophyte development to endosperm genetics. *International Journal of Plant*  
627 *Sciences* **169**: 79-92.  
628  
629 Fu XL, Lu YG, Liu XD, Li JQ. 2009. Crossability barriers in the interspecific hybridization  
630 between *Oryza sativa* and *O. meyeriana*. *Journal of integrative plant biology* **51**: 21-28.  
631

- 632 Galbraith DW, Harkins KR, Knapp S. 1991. Systemic endopolyploidy in *Arabidopsis thaliana*.  
633 *Plant Physiology* **96**: 985-989.  
634
- 635 Galen C, Newport MEA. 1988. Pollination quality, seed set, and flower traits in *Polemonium*  
636 *viscosum*: complementary effects of variation in flower scent and size. *American Journal of*  
637 *Botany*, 900-905.  
638
- 639 Gardner M, Macnair M. 2000. Factors affecting the co-existence of the serpentine endemic  
640 *Mimulus nudatus* Curran and its presumed progenitor, *Mimulus guttatus* Fischer ex DC.  
641 *Biological Journal of the Linnean Society* **69**: 443-459.  
642
- 643 Gillmor CS, Silva-Ortega CO, Willmann MR, Buendía-Monreal M, Poethig RS. 2014. The  
644 *Arabidopsis* Mediator CDK8 module genes CCT (MED12) and GCT (MED13) are global  
645 regulators of developmental phase transitions. *Development* **141**: 4580-4589.  
646
- 647 Girke T, Todd J, Ruuska S, White J, Benning C, & Ohlrogge J. 2000. Microarray analysis of  
648 developing *Arabidopsis* seeds. *Plant Physiology* **124**: 1570-1581.  
649
- 650 Grossniklaus U, Spillane C, Page DR, Köhler C. 2001. Genomic imprinting and seed  
651 development: endosperm formation with and without sex. *Current opinion in plant biology*, **4**:  
652 21-27.  
653
- 654 Guignard L. 1899. Sur les anthérozoïdes et la double copulation sexuelle chez les végétaux  
655 angiospermes. *Comptes Rendus de l'Académie des Sciences de Paris* **128**: 864-871.  
656
- 657 Haig D. 2013. Kin conflict in seed development: an interdependent but fractious collective.  
658 *Annual review of cell and developmental biology* **29**: 189-211.  
659
- 660 Haig D, Westoby M. 1991. Genomic imprinting in endosperm: its effect on seed development in  
661 crosses between species, and between different ploidies of the same species, and its implications  
662 for the evolution of apomixis. *Philosophical Transactions of the Royal Society, B* **333**: 1-13.  
663
- 664 Hehenberger E, Kradolfer D, Köhler C. 2012. Endosperm cellularization defines an important  
665 developmental transition for embryo development. *Development* **139**: 2031-2039.  
666
- 667 Hoballah ME, Gübitz T, Stuurman J, Broger L, Barone M, Mandel T, Dell'Olivo A, Arnold M,  
668 Kuhlemeier C. 2007. Single gene-mediated shift in pollinator attraction in *Petunia*. *The Plant*  
669 *Cell Online* **19**: 779-790.  
670
- 671 Hsieh TF, Shin J, Uzawa R, Silva P, Cohen S, Bauer MJ, Hashimoto M, Kirkbride RC, Harada  
672 JJ, Zilberman D, Fischer RL. 2011. Regulation of imprinted gene expression in *Arabidopsis*  
673 endosperm. *Proceedings of the National Academy of Sciences* **108**: 1755-1762.  
674



- 675 Johnston SA, Hanneman RE. 1982. Manipulations of endosperm balance number overcome  
676 crossing barriers between diploid *Solanum* species. *Science* **217**: 446-448.  
677
- 678 Josefsson C, Dilkes B, Comai L. 2006. Parent-dependent loss of gene silencing during  
679 interspecies hybridization. *Current Biology* **16**: 1322-1328.  
680
- 681 Kearns CA, Inouye DW. 1993. *Techniques for Pollination Biologists*. University Press of  
682 Colorado, CO. pp. 77-151  
683
- 684 Köhler, C, L. Hennig, C. Spillane, P. Stephane, W. Gruissem, and U. Grossniklaus. 2003. The  
685 *Polycomb*-group protein *MEDEA* regulates seed development by controlling expression of the  
686 MADS-box gene *PHERES1*. *Genes and Development* **17**: 1540-1553  
687
- 688 Kradolfer D, Hennig L, Köhler C. 2013. Increased maternal genome dosage bypasses the  
689 requirement of the *FIS* polycomb repressive complex 2 in *Arabidopsis* seed development. *PLoS*  
690 *genetics* **9**: e1003163.  
691
- 692 Köhler C, Mittelsten Scheid O, Erilova A. 2010. The impact of the triploid block on the origin  
693 and evolution of polyploid plants. *Trends in Genetics* **26**: 142-148.  
694
- 695 Köhler C, Wolff P, Spillane C. 2012. Epigenetic mechanisms underlying genomic imprinting in  
696 plants. *Annual review of plant biology* **63**: 331-352.  
697
- 698 Maynard Smith J, Burian R, Kauffman S, Alberch P, Campbell J, Goodwin B, Lande R, Raup D,  
699 Wolpert L. 1985. Developmental constraints and evolution: a perspective from the Mountain  
700 Lake conference on development and evolution. *Quarterly Review of Biology* **60**: 265-287.  
701
- 702 Lester RN, Kang JH. 1998. Embryo and endosperm function and failure in *Solanum* species and  
703 hybrids. *Annals of Botany* **82**: 445-453.  
704
- 705 Linkies A, Graeber K, Knight C, Leubner-Metzger G. 2010. The evolution of seeds. *New*  
706 *Phytologist* **186**: 817-831.  
707
- 708 Lowry DB, Willis JH. 2010. A widespread chromosomal inversion polymorphism contributes to  
709 a major life-history transition, local adaptation, and reproductive isolation. *PLoS Biology* **8**:  
710 e1000500.  
711
- 712 Martin NH, Willis JH. 2010. Geographical variation in postzygotic isolation and its genetic basis  
713 within and between two *Mimulus* species. *Philosophical Transactions of the Royal Society B*  
714 **365**:3469-2478.  
715
- 716 Nawaschin SG. 1898. Resultate einer Revision der Befruchtungs- vorgänge bei *Lilium martagon*  
717 und *Fritillaria tenella*. *Bulletin de l'Academie des Sciences de Saint Petersburg* **9**: 377-382.  
718

- 719 Nguyen H, Brown RC, Lemmon BE. 2000. The specialized chalazal endosperm in *Arabidopsis*  
720 *thaliana* and *Lepidium virginicum* (Brassicaceae). *Protoplasma* **212**: 99-110.  
721
- 722 Oneal E, Lowry DB, Wright KM, Zhu Z, Willis JH. 2014. Divergent population structure and  
723 climate associations of a chromosomal inversion polymorphism across the *Mimulus guttatus*  
724 species complex. *Molecular ecology* **23**: 2844-2860.  
725
- 726 Pal M, Pandey RM, Khoshoo TN. 1982. Evolution and improvement of cultivated amaranths.  
727 *Journal of Heredity* **73**: 353-356.  
728
- 729 Płachno BJ, Świątek P, Sas-Nowosielska H, Kozieradzka-Kiszkurno M. 2013. Organisation of  
730 the endosperm and endosperm–placenta syncytia in bladderworts (Utricularia, Lentibulariaceae)  
731 with emphasis on the microtubule arrangement. *Protoplasma* **250**: 863-873.  
732
- 733 Ramsey J, Bradshaw HD, Schemske DW. 2003. Components of reproductive isolation between  
734 the monkeyflowers *Mimulus lewisii* and *M. cardinalis* (Phrymaceae). *Evolution* **57**: 1520-1534.  
735
- 736 Rasband WS. ImageJ. U. S. National Institutes of Health, Bethesda, Maryland, USA,  
737 <http://imagej.nih.gov/ij/>, 1997-2014.  
738
- 739 Reyes JC, Grossniklaus U. 2003. Diverse functions of *Polycomb* group proteins during plant  
740 development. *Seminars in Cell and Developmental Biology* **14**: 77-84  
741
- 742 Rieseberg LH, Willis JH. 2007. Plant speciation. *Science* **317**: 910-914.  
743
- 744 Ritland C, Ritland K. 1989. Variation of sex allocation among eight taxa of the *Mimulus guttatus*  
745 species complex (Scrophulariaceae). *American Journal of Botany* **1989**: 1731-1739.  
746
- 747 Roszak, P, & Köhler, C. 2011. Polycomb group proteins are required to couple seed coat  
748 initiation to fertilization. *PNAS* **108**: 20826-20831.  
749
- 750 Running, M. 2007. Nuclear Staining of Plants for Confocal Microscopy. *Cold Spring Harbor*  
751 *Protocols*, **2007**: pdb-prot4685.  
752
- 753 Schemske DW, Bradshaw HD. 1999. Pollinator preference and the evolution of floral traits in  
754 monkeyflowers (*Mimulus*). *PNAS* **96**: 11910-11915.  
755
- 756 Scott RJ, Spielman M, Bailey J, Dickinson HG. 1998. Parent-of-origin effects on seed  
757 development in *Arabidopsis thaliana*. *Development* **125**: 3329-3341.  
758
- 759 Searcy KB, Macnair MR. 1990. Differential seed production in *Mimulus guttatus* in response to  
760 increasing concentrations of copper in the pistil by pollen from copper tolerant and sensitive  
761 sources. *Evolution* **1990**: 1424-1435.  
762

- 763 Tiffin P, Olson S, Moyle LC. 2001. Asymmetrical crossing barriers in angiosperms. *Proceedings*  
764 *of the Royal Society of London, B* **268**: 861-867.  
765
- 766 Vickery RK. 1966. Speciation and isolation in section Simiolus of the genus *Mimulus*. *Taxon* **15**:  
767 55-63.  
768
- 769 Vickery RK. 1978. Case studies in the evolution of species complexes in *Mimulus*. In: Hecht  
770 MK, Steere WC, Wallace B., eds. *Evolutionary Biology*, Volume 11, pp 405-507.  
771
- 772 Williams, JH. 2009. *Amborella trichopoda* (Amborellaceae) and the evolutionary developmental  
773 origins of the angiosperm progamic phase. *American Journal of Botany*, **96**: 144-165  
774
- 775 Wright KM, Lloyd D, Lowry DB, Macnair MR, Willis JH. 2013. Indirect evolution of hybrid  
776 lethality due to linkage with selected locus in *Mimulus guttatus*. *PLoS biology* **11**: e1001497.  
777
- 778 Wu CA, Lowry DB, Cooley AM, Wright KM, Lee YW, Willis JH. 2007. *Mimulus* is an  
779 emerging model system for the integration of ecological and genomic studies. *Heredity* **100**: 220-  
780 230.  
781
- 782 Yuan YW, Sagawa JM, Frost L, Vela JP, Bradshaw HD. 2014. Transcriptional control of floral  
783 anthocyanin pigmentation in monkeyflowers (*Mimulus*). *New Phytologist* **204**: 1013-1027.  
784  
785

785 **Figure 1.** Images of pollen tubes penetrating the ovaries within 24-hours of pollination for  
786 interspecific crosses of *M. guttatus* and *M. nudatus*. Pollen tubes are stained with aniline blue  
787 and visualized with a Zeiss Axio Observer equipped with a fluorescent lamp and DAPI filter. (a)  
788 An unpollinated *M. guttatus* ovary. (b) Pollen tubes from *M. nudatus* pollen growing down a *M.*  
789 *guttatus* style. (c) Pollen tubes from *M. guttatus* pollen growing down a *M. nudatus* style.

791 **Figure 2.** Developing fruits resulting from *M. guttatus* and *M. nudatus* self-fertilizations and  
792 reciprocal crosses of *M. guttatus* x *M. nudatus*, as well as images of mature seed recovered from  
793 self-fertilized and hybrid fruits. All crosses are female x male. (a) *M. guttatus* self-fertilized fruit.  
794 (b) *M. nudatus* self-fertilized fruit. (c) *M. guttatus* x *M. nudatus* fruit. (d) *M. nudatus* x *M.*  
795 *guttatus*. (e) round *M. guttatus* seed; shriveled and flat *M. guttatus* x *M. nudatus* seed. (f) **d**:  
796 round *M. nudatus* seed; shriveled and flat *M. nudatus* x *M. guttatus* seed. All seed types appear  
797 to have developed a seed coat.

799 **Figure 3.** Percentages of each mature seed phenotype resulting from self-fertilized *M. guttatus*  
800 and *M. nudatus* self-fertilizations and reciprocal *M. guttatus* x *M. nudatus* crosses, pooled across  
801 accessions. All crosses are female x male.

803 **Figure 4.** Seed set for self-fertilized and reciprocal crosses of *M. guttatus* and *M. nudatus*,  
804 pooled across accessions. For seed set by accession, see Supplementary Figure 1. All crosses are  
805 female x male.

807 **Figure 5.** Development of normal *M. guttatus* and *M. nudatus* seeds. LCM images were selected  
808 that represent typical development at each stage. **an**: antipodal nuclei; **ccn**: central cell nucleus;  
809 **c**: chalazal end; **ch**: chalazal haustorium; **ec**: egg cell; **en**: endosperm; **em**: embryo; **m**:  
810 micropylar end; **mh**: micropylar haustorium; **mn**: micropylar nucleus; **pen**: primary endosperm  
811 nucleus; **sn**: synergid nucleus; (a) *M. guttatus* unfertilized ovule. (b) *M. guttatus*, 2 days after  
812 pollination (DAP); endosperm (**en**) has undergone at least three divisions. (c) *M. guttatus*, 3 DAP  
813 with faintly visible chalazal haustorium (**ch**), an embryo (**em**) and micropylar nuclei (**mn**) with  
814 multiple nucleoli. (d) *M. guttatus*, 4 DAP with a 16-cell embryo (**em**) with suspensor, and a  
815 micropylar nucleus (**mn**) with multiple nucleoli. (e) *M. guttatus*, 5 DAP. Endosperm (**en**) is  
816 densely packed and surrounds the globular embryo (**em**). (f) *M. nudatus*, 2 DAP with one  
817 nucleus (**en**) in the chalazal domain and one nucleus in the micropylar domain (**mn**). (g) *M.*  
818 *nudatus*, 3 DAP: a chalazal haustorium (**ch**) is plainly visible, a micropylar haustorium (**mh**)  
819 with nuclei has been established, and transverse division of endosperm nuclei (**en**) is occurring.  
820 (h) *M. nudatus*, 4 DAP, displaying a prominent chalazal haustorium (**ch**) with two heavily  
821 nucleolated nuclei, proliferating endosperm (**en**), an 8-cell embryo (**em**) and a micropylar  
822 haustorium (**mh**) (the cells of the mh are not visible in this microscopic plane). (i) *M. nudatus*, 5  
823 DAP. The chalazal haustorium (**ch**) has largely degraded, and a 16-cell embryo (**em**) is visible.

825 **Figure 6.** Compared to self-fertilized *M. guttatus* and *M. nudatus* seed at 5 DAP (a-d) and 9  
826 DAP (e-i), reciprocal *M. guttatus* x *M. nudatus* hybrid seed exhibit delayed embryo growth and  
827 impaired endosperm development. All crosses are female x male. **c**: chalazal end; **en**:  
828 endosperm; **em**: embryo; **m**: micropylar end; **mn**: micropylar nuclei; **sc**: seed coat. (a) *M.*

829 *guttatus* self-fertilized seed at 5 DAP. Endosperm (**en**) has nuclei with regularly dispersed cell  
830 walls and an embryo (**em**) is at the globular stage. (b) *M. guttatus* x *M. nudatus* seed at 5 DAP.  
831 Endosperm (**en**) resembles that of self-fertilized *M. guttatus*, but embryo (**em**) is delayed at 8-  
832 cell stage. (c) *M. nudatus* self-fertilized seed at 5 DAP. Endosperm (**en**) has nuclei with  
833 regularly dispersed cell walls and embryo (**em**) is at the 16-cell stage; micropylar nuclei (**mn**) are  
834 also visible. (d) *M. nudatus* x *M. guttatus* seed at 5 DAP. Endosperm (**en**) is poorly developed  
835 and embryo (**em**) is at the 8-cell stage. (e) *M. guttatus* seed at 9 DAP. These seeds have a well-  
836 developed seed coat (**sc**), densely packed endosperm (**en**), and a torpedo stage embryo (**em**). (f  
837 and g) *M. guttatus* x *M. nudatus* seed at 9 DAP, with loosely packed and irregularly deposited  
838 endosperm (**en**) and a heart stage embryo (**em**). (h) *M. nudatus* seed at 9 DAP with densely  
839 packed endosperm (**en**) and a heart stage endosperm (**em**). (i) *M. nudatus* x *M. guttatus* seed with  
840 irregularly developed endosperm (**en**) and late globular stage embryo (**em**).

841 **Figure 7.** Images of the *M. guttatus* unfertilized ovule (a) and early arrested hybrid seed from  
842 reciprocal, sympatric crosses between *M. guttatus* and *M. nudatus* (b-f). All crosses are female x  
843 male. Early arrested hybrid seed show clear signs of fertilization, including a widened primary  
844 endosperm cell (**pec**) compared to the width of the gametophytic central cell (a, b, d), signs of  
845 mitosis within the primary endosperm nucleus (**pen**) (i.e., visible nucleoli), the development of  
846 micropylar nuclei (**mn**) and, occasionally, a visible embryo (**em**). **c**: chalazal end; **ccn**: central  
847 cell nucleus; **cw**: cell wall; **em**: embryo; **en**: endosperm; **enn**: endosperm nucleus; **m**: micropylar  
848 end; **mh**: micropylar haustorium; **mn**: micropylar nucleus; **pec**: primary endosperm cell; **pen**:  
849 primary endosperm nucleus; All crosses are female x male. (a) *M. guttatus* female gametophyte.  
850 (b) *M. guttatus* x *M. nudatus*, 2 days after pollination (DAP) with an undivided primary  
851 endosperm nucleus (**pen**); a micropylar nucleus is visible. (c) arrested *M. guttatus* x *M. nudatus*  
852 seed, 5 DAP; endosperm nucleus (**enn**) has multiple nucleoli evident, but there is little to no  
853 endosperm present; a micropylar nucleus (**mn**) with multiple nucleoli and an embryo (**em**) are  
854 presented. (d) *M. nudatus* x *M. guttatus* seed, 2 DAP, with an undivided primary endosperm  
855 nucleus (**pen**). (e) arrested *M. nudatus* x *M. guttatus* seed, 5 DAP. One endosperm nucleus (**enn**)  
856 with at least one nucleolus is visible, as is a possible endosperm cell wall (**cw**). (f) *M. nudatus* x  
857 *M. guttatus* arrested seed, 9 DAP. A primary endosperm cell (**pec**) and micropylar haustorium  
858 (**mh**) are visible.

859  
860 **Figure 8.** Growth trajectories of self-fertilized and hybrid seed, pooled across accessions. For  
861 seed size increase by accession, see Supplementary Figure 2. All crosses are female x male. (a)  
862 *M. guttatus* self-fertilized seed and *M. guttatus* x *M. nudatus* hybrid seed. (b) *M. nudatus* self-  
863 fertilized seed and *M. nudatus* x *M. guttatus* seed.

864  
865 **Figure 9.** Vanillin stain test for developed seed coat. All crosses are female x male. (a) Ovule  
866 from *M. nudatus* unpollinated ovaries collected 5 days after emasculation. (b) *M. guttatus* x *M.*  
867 *nudatus* seed, 5 DAP (C) *M. nudatus* x *M. guttatus* seed, 5DAP. Two hybrid seed types are  
868 visible: small, arrested seed. Both appear to have seed coat.

869

870 **Supplementary Figure 1.** (a) Seed set for self-fertilized *M. guttatus* accessions and sympatric *M.*  
871 *guttatus* x *M. nudatus* crosses. (b) Seed set for self-fertilized *M. nudatus* accessions and  
872 sympatric *M. nudatus* x *M. guttatus* crosses. All crosses are female x male.

873

874 **Supplementary Figure 2.** (A) Percentages of each mature seed phenotype resulting from self-  
875 fertilized *M. guttatus* and sympatric *M. guttatus* x *M. nudatus* crosses. (B) Percentages of each  
876 mature seed phenotype resulting from self-fertilized *M. nudatus* and sympatric *M. nudatus* x *M.*  
877 *guttatus* crosses. All crosses are female x male.

878

879 **Supplementary Figure 3.** Growth trajectories of self-fertilized seed and hybrid seed from  
880 sympatric, pairwise crosses between *M. guttatus* x *M. nudatus*, broken down by accession. All  
881 crosses are female x male. (a) CSS4 self-fertilized seed and CSS4 x CSH10 hybrid seed. (b)  
882 DHR14 self-fertilized seed and DHR14 x DHRo22 hybrid seed. (c) CSH10 self-fertilized seed  
883 and CSH10 x CSS4 hybrid seed. (d) DHRo22 self-fertilized seed and DHRo22 x DHR14 seed.

884

885

886

887

888

889

890

890  
891  
892  
893  
894  
895  
896  
897  
898  
899  
900  
901  
902  
903

**Table 1** Sampling localities and accession names for sympatric serpentine-adapted *M. guttatus* and *M. nudatus* populations.

| Accessions                             | Latitude (N) | Longitude (W) |
|----------------------------------------|--------------|---------------|
| <i>M. guttatus</i> / <i>M. nudatus</i> |              |               |
| CSS4/CSH10                             | 38.861       | -122.415      |
| DHR14/DHRo22                           | 38.859       | -122.411      |

903  
904  
905  
906  
907  
908  
909  
910  
911  
912  
913  
914  
915  
916  
917  
918  
919

**Table 2** Pollen germination and ovary penetration data for sympatric interspecific crosses between *M. guttatus* and *M. nudatus*. All crosses are female x male.

| Cross                                  | <i>N</i> | Pollen germinated | Ovary Penetration |
|----------------------------------------|----------|-------------------|-------------------|
| <i>M. guttatus</i> x <i>M. nudatus</i> |          |                   |                   |
| CSS4 x CSH10                           | 10       | 100%              | 90%               |
| DHR14 x DHRo22                         | 10       | 100%              | 80%               |
| <i>M. nudatus</i> x <i>M. guttatus</i> |          |                   |                   |
| CSH10 x CSS4                           | 10       | 100%              | 90%               |
| DHRo22 x DHR14                         | 10       | 100%              | 80%               |



919  
920  
921  
922  
923  
924  
925  
926  
927  
928  
929  
930  
931  
932  
933  
934  
935  
936  
937  
938  
939  
940  
941  
942  
943  
944  
945  
946  
947  
948  
949  
950  
951

**Table 3** Germination success of self-fertilized and hybrid seed. All crosses are female x male.

|                                               | Seed type        | % Germinated | <i>N</i> |
|-----------------------------------------------|------------------|--------------|----------|
| <u>Self-fertilized</u>                        |                  |              |          |
| <i>M. guttatus</i> CSS4                       | round            | 96.0         | 25       |
| <i>M. guttatus</i> CSS4                       | shriveled        | 11.3         | 106      |
| <i>M. guttatus</i> CSS4                       | small, flat      | 0.0          | 14       |
| <i>M. guttatus</i> DHR14                      | round            | 88.0         | 25       |
| <i>M. guttatus</i> DHR14                      | shriveled        | 15.6         | 115      |
| <i>M. nudatus</i> CSH10                       | round            | 81.2         | 16       |
| <i>M. nudatus</i> CSH10                       | shriveled        | 4.40         | 91       |
| <i>M. nudatus</i> CSH10                       | flat             | 0.0          | 2        |
| <i>M. nudatus</i> DHRo22                      | round            | 43.8         | 16       |
| <i>M. nudatus</i> DHRo22                      | shriveled        | 0.0          | 30       |
| <u><i>M. guttatus</i> x <i>M. nudatus</i></u> |                  |              |          |
| CSS4 x CSH10                                  | round            | 0.0          | 1        |
| CSS4 x CSH10                                  | large, flattened | 10.7         | 75       |
| CSS4 x CSH10                                  | small, flattened | 0.0          | 50       |
| DHR14 x DHRo22                                | large, flattened | 2.78         | 108      |
| DHR14 x DHRo22                                | small, flattened | 0.0          | 17       |
| <u><i>M. nudatus</i> x <i>M. guttatus</i></u> |                  |              |          |
| CSH10 x CSS4                                  | round, exploded  | 0.0          | 2        |
| CSH10 x CSS4                                  | large, flattened | 0.0          | 104      |
| CSH10 x CSS4                                  | small, flattened | 0.0          | 50       |
| DHRo22 x DHR14                                | large, flattened | 0.0          | 98       |
| DHRo22 x DHR14                                | small, flattened | 0.0          | 138      |

951

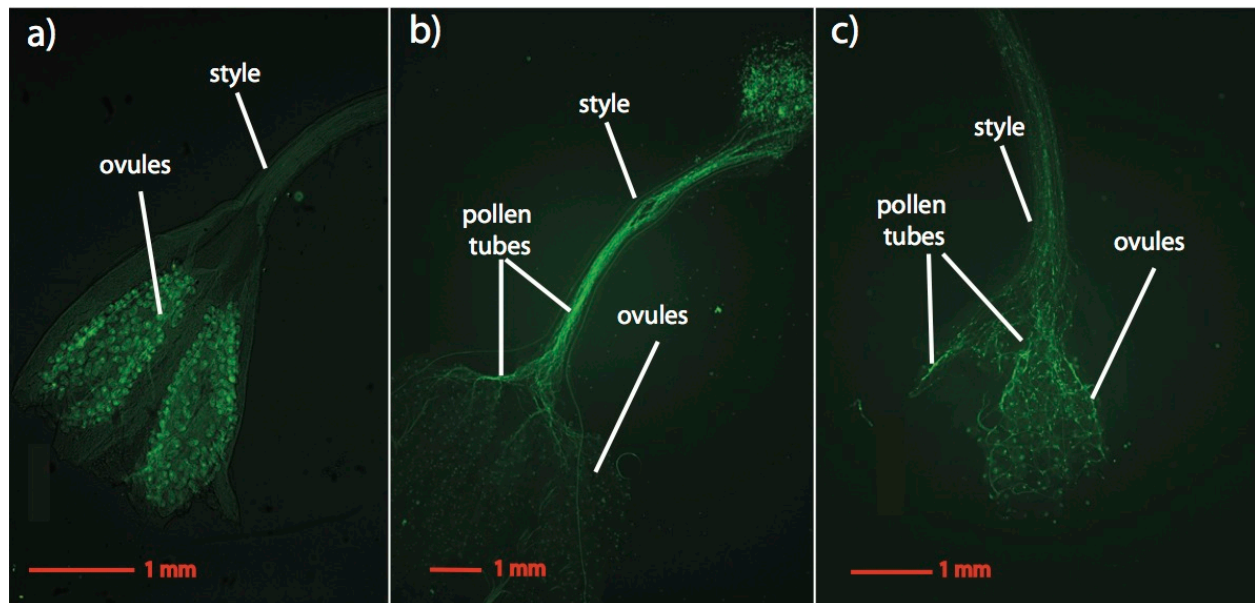

952  
953  
954  
955

**Figure 1**

955

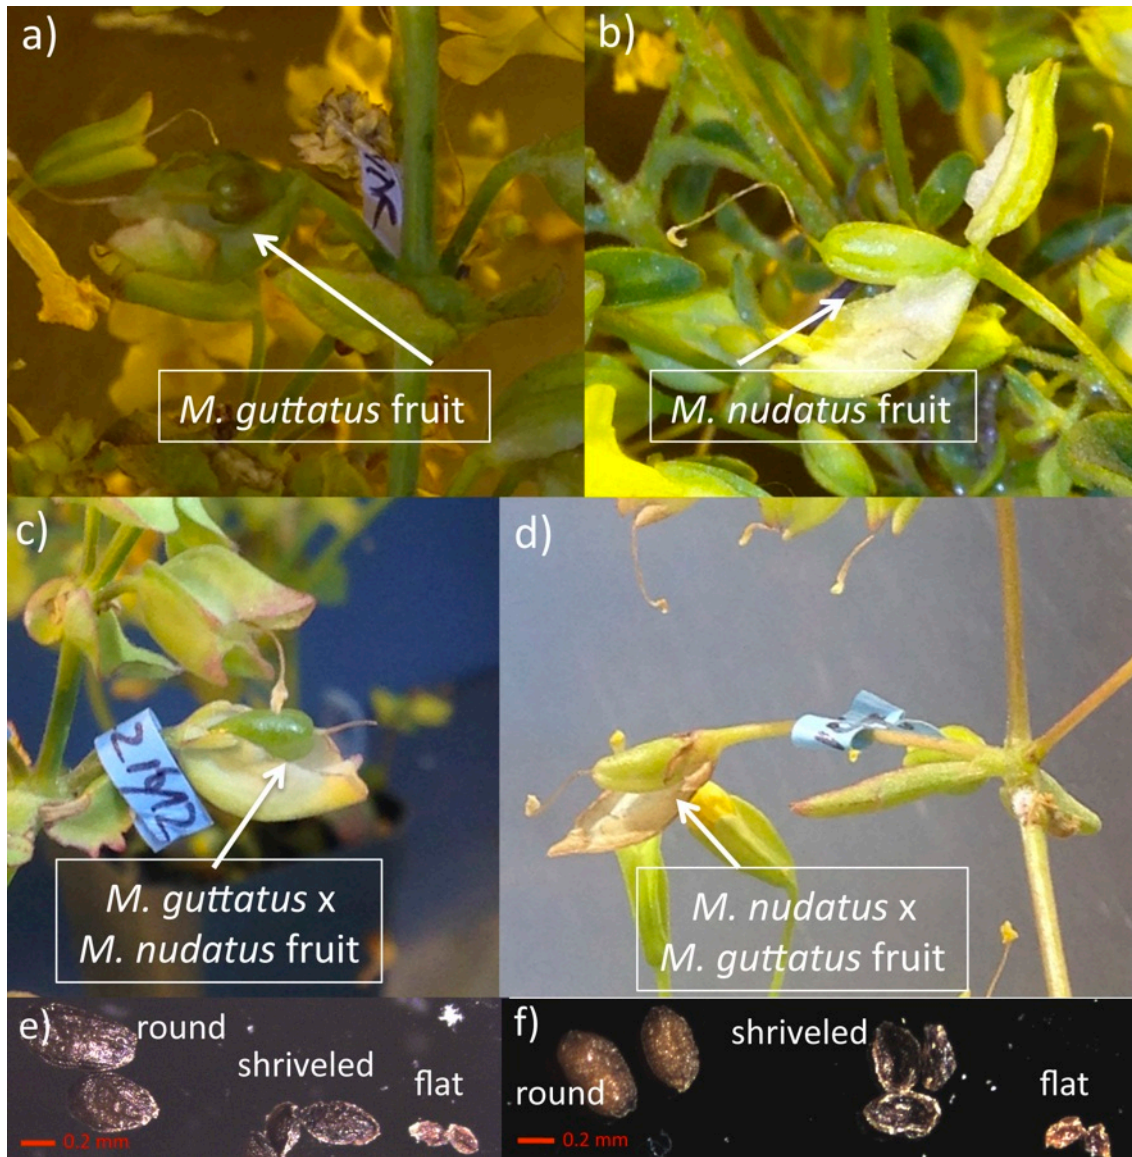

956  
957  
958  
959

**Figure 2**

959

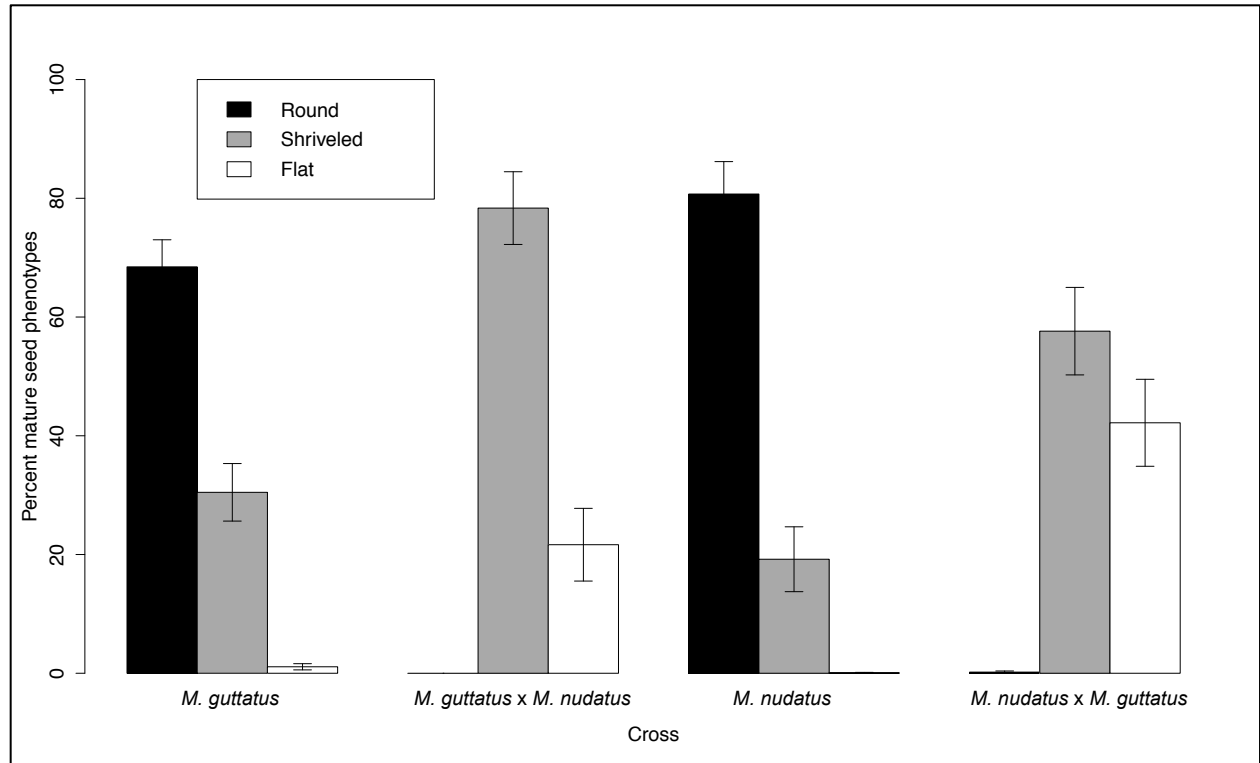

960  
961  
962  
963  
964

**Figure 3**

964

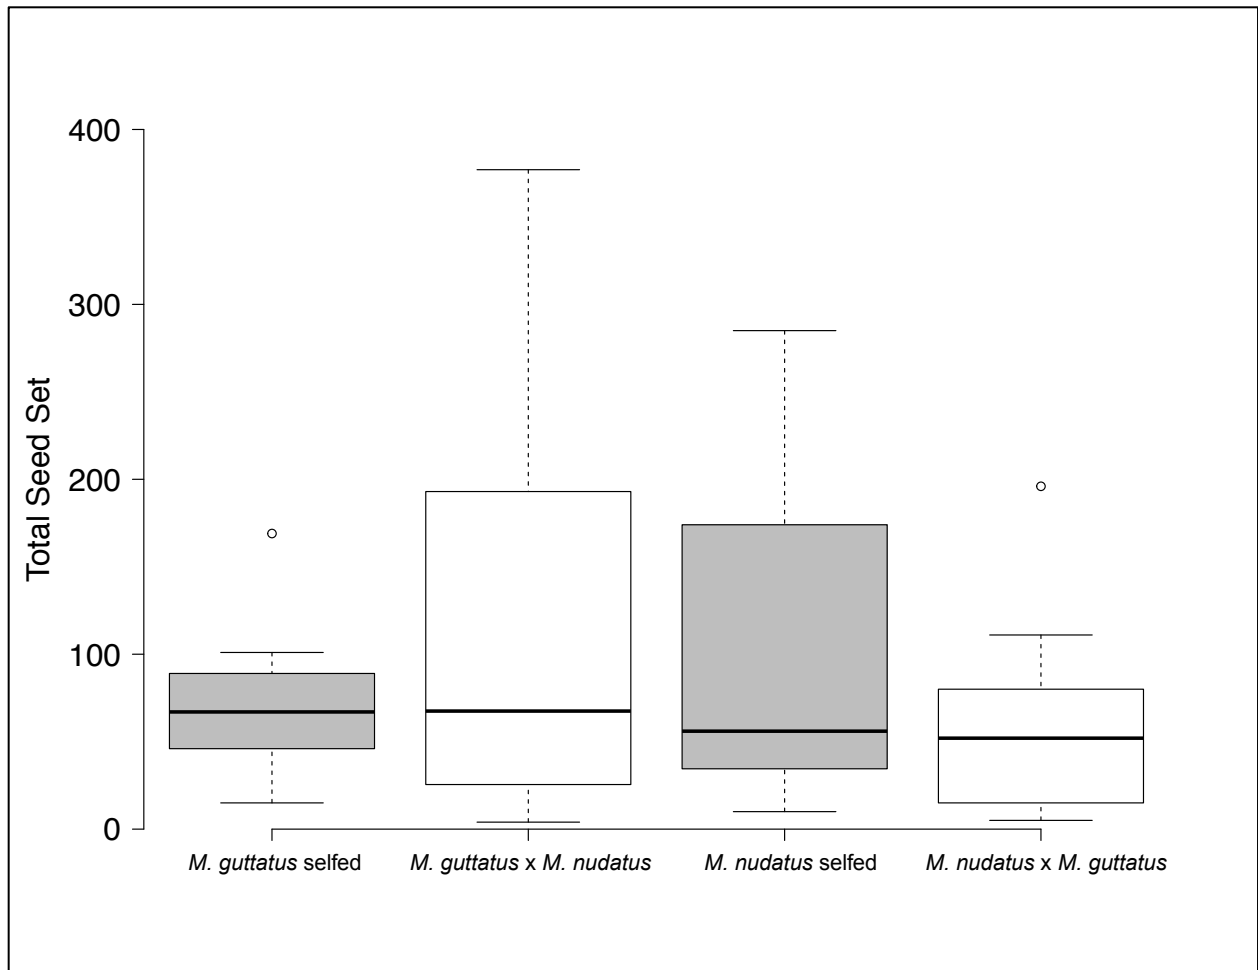

965  
966  
967

Figure 4

967

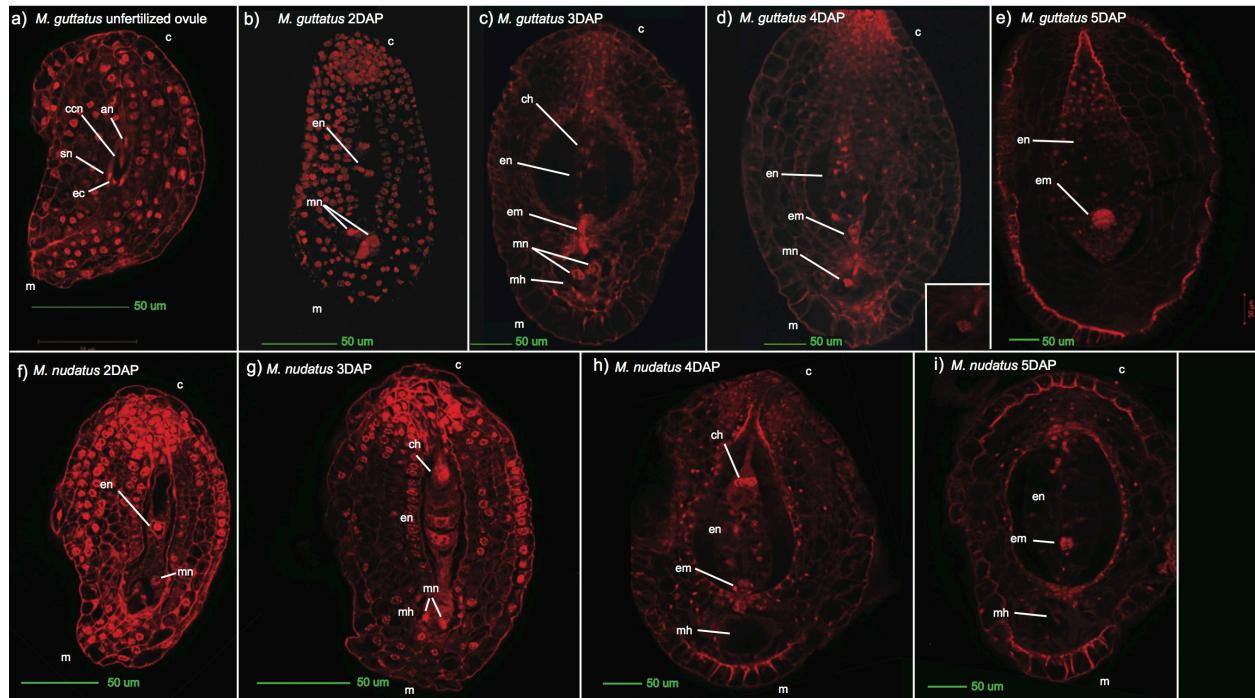

968  
969  
970

**Figure 5**

970

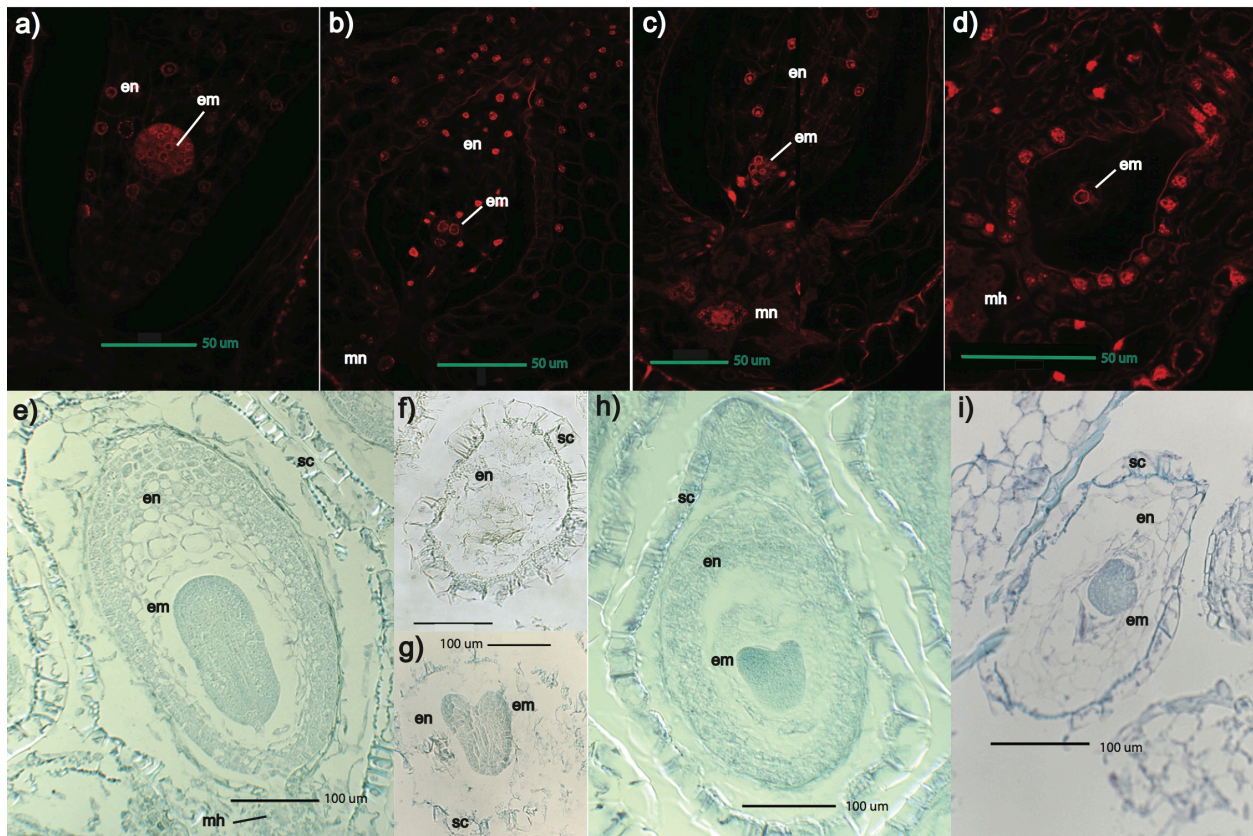

971  
972  
973

**Figure 6**

973

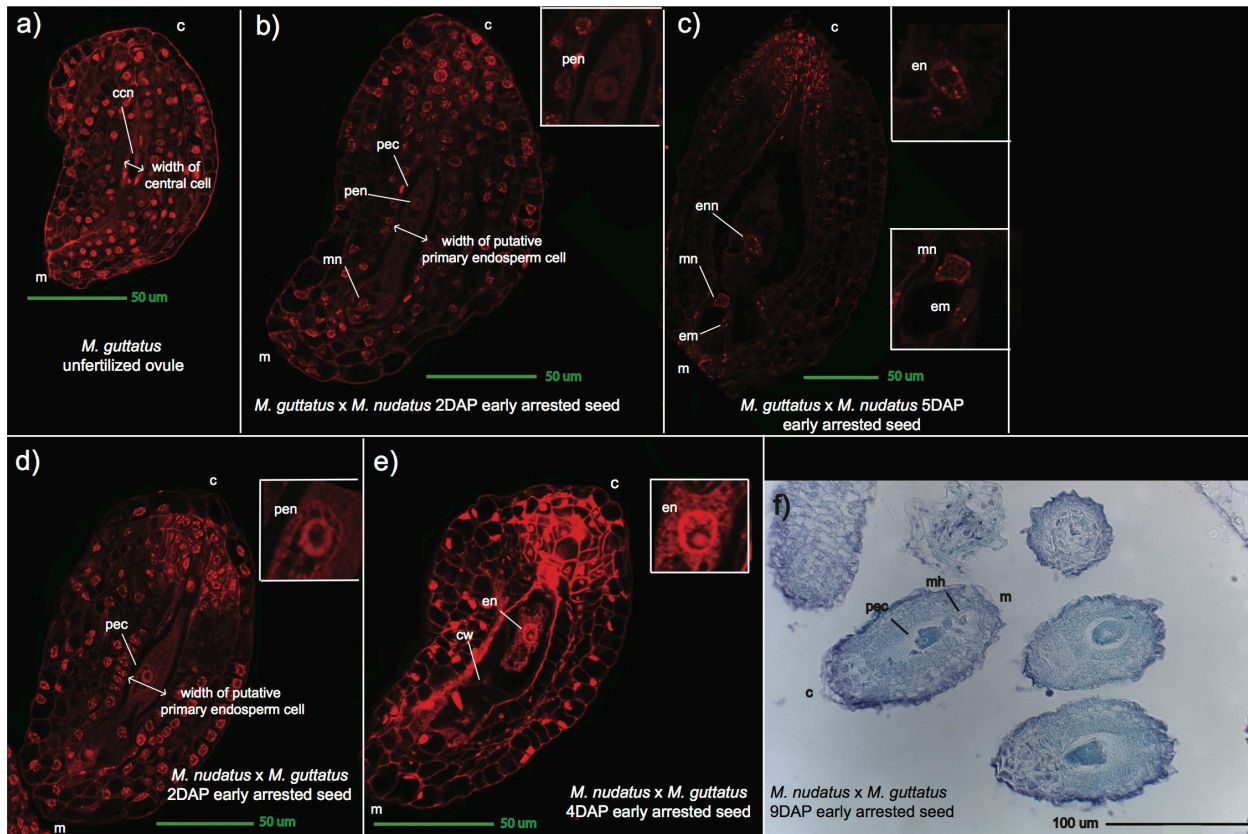

974

975

976

**Figure 7**



976

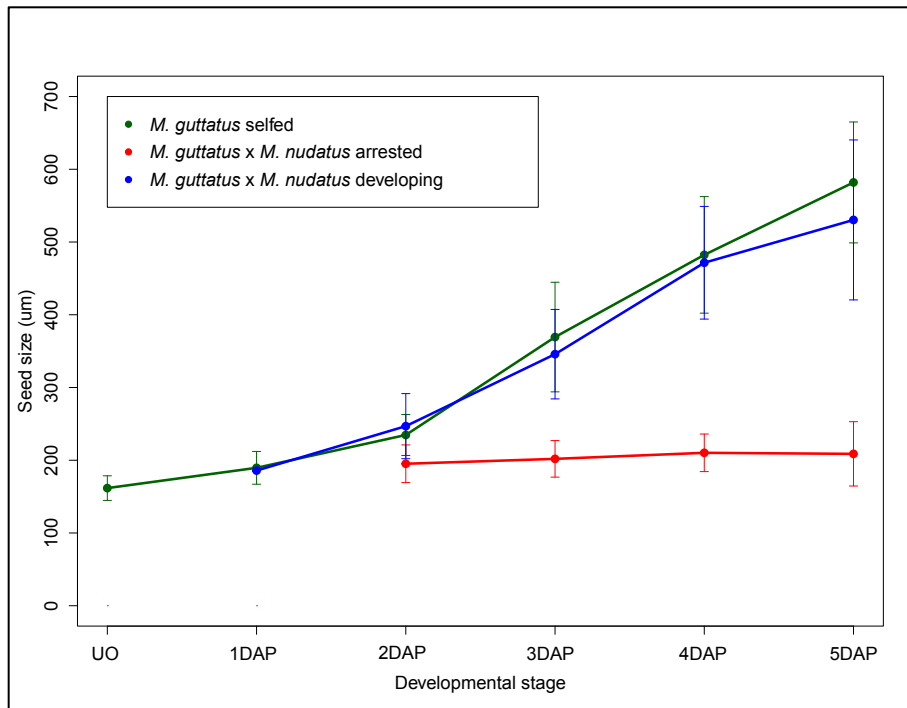

977

978

979

Figure 8a

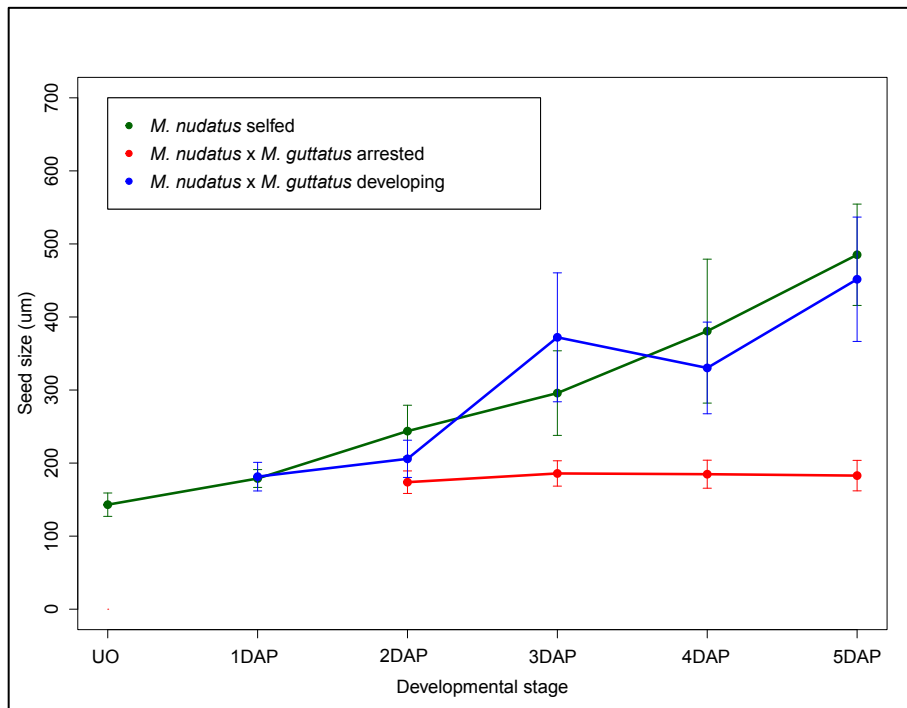

980

981

982

Figure 8b

982

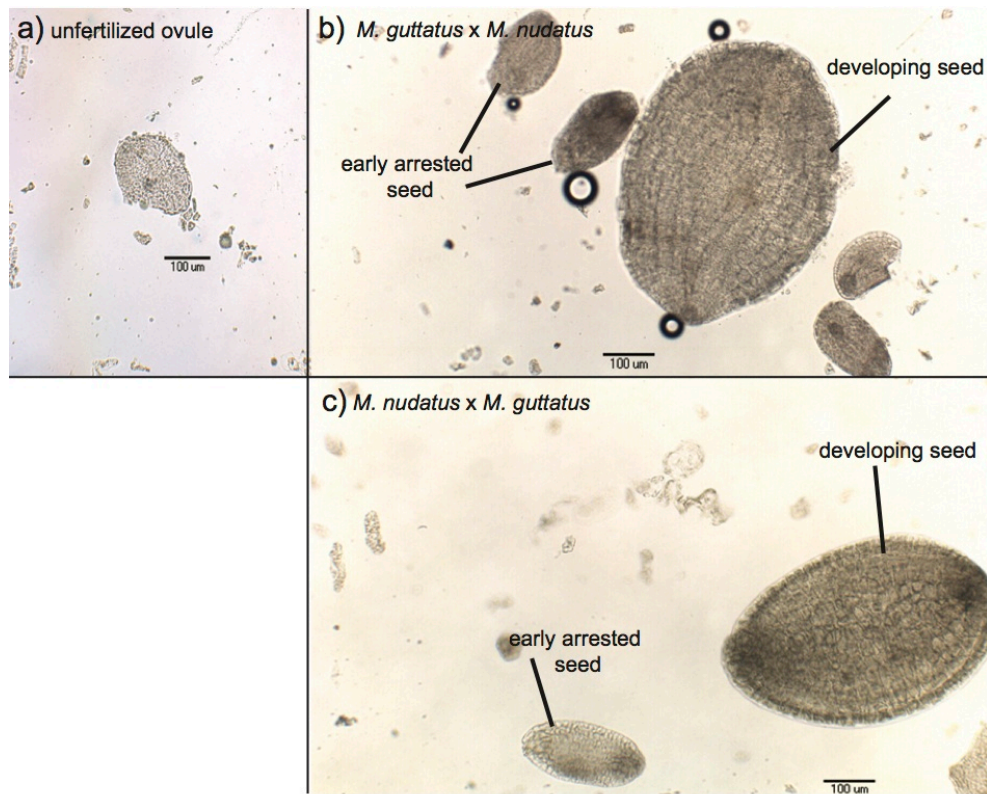

983

984

**Figure 9**
